# Supplementary material for: Novel furo[2,3-d]pyrimidine derivatives as PI3K/AKT dual inhibitors: design, synthesis, biological evaluation, and molecular dynamics simulation
Source: Royal Society of Chemistry journal article supplement (doi:10.1039/d5md00139k), 2025-01-01
Supplement: d5md00139k1.xlsx [file d5md00139k1.xlsx]

## Sheet: 10a PI3K 
Conc	% inhibition		e
100	88.6
10	80.4		2.71828
1	52.3
0.1	20.5
0.01	13
Conc.	Found % inhibition	Excel-Fit
100	88.6	93.1802
10	80.4	93.1802
1	52.3	50.96
0.1	20.5	29.8499
0.01	13	8.7398
IC50	0.9	0.900584
		9.168
		50.96
Equation that describes the curve
y = 9.168ln(x) + 50.96

## Sheet: 10b PI3K  
Conc	% inhibition		e
100	93.6
10	84.4		2.71828
1	62.7
0.1	44.8
0.01	28.6
Conc.	Found % inhibition	Excel-Fit
100	93.6	96.7398
10	84.4	96.7398
1	62.7	62.82
0.1	44.8	45.8601
0.01	28.6	28.9002
IC50	0.175	0.175429
		7.3656
		62.82
Equation that describes the curve
y = 7.3656ln(x) + 62.82

## Sheet: 10c PI3K  
Conc	% inhibition		e
100	86.5
10	71		2.71828
1	37.5
0.1	10.5
0.01	4.74
Conc.	Found % inhibition	Excel-Fit
100	86.5	86.8517
10	71	86.8517
1	37.5	42.048
0.1	10.5	19.6461
0.01	4.74	-2.7557
IC50	2.264	2.26449
		9.729
		42.048
Equation that describes the curve
y = 9.7291ln(x) + 42.048

## Sheet: 10d PI3K  
Conc	% inhibition		e
100	91.4
10	80.4		2.71828
1	57.4
0.1	30.6
0.01	18.7
Conc.	Found % inhibition	Excel-Fit
100	91.4	94.7399
10	80.4	94.7399
1	57.4	55.7
0.1	30.6	36.1801
0.01	18.7	16.6601
IC50	0.51	0.510494
		8.4774
		55.7
Equation that describes the curve
y = 8.4774ln(x) + 55.7

## Sheet: Alpelisib PI3K 
Conc	% inhibition		e
100	94.1
10	88.3		2.71828
1	72.3
0.1	50.2
0.01	37.4
Conc.	Found % inhibition	Excel-Fit
100	94.1	98.7602
10	88.3	98.7602
1	72.3	68.46
0.1	50.2	53.3099
0.01	37.4	38.1598
IC50	0.061	0.060468
		6.5796
		68.46
Equation that describes the curve
y = 6.5796ln(x) + 68.46

## Sheet: 10a AKT  
Conc	% inhibition		e
100	88.4
10	75.2		2.71828
1	48.8
0.1	27.5
0.01	8.64
Conc.	Found % inhibition	Excel-Fit
100	88.4	91.1522
10	75.2	91.1522
1	48.8	49.708
0.1	27.5	28.9859
0.01	8.64	8.26377
IC50	1.032	1.03298
		8.9995
		49.708
Equation that describes the curve
y = 8.9995ln(x) + 49.708

## Sheet: 10b AKT   
Conc	% inhibition		e
100	90.7
10	78.5		2.71828
1	62
0.1	36.6
0.01	18.3
Conc.	Found % inhibition	Excel-Fit
100	90.7	94.5601
10	78.5	94.5601
1	62	57.22
0.1	36.6	38.5499
0.01	18.3	19.8799
IC50	0.411	0.410473
		8.1083
		57.22
Equation that describes the curve
y = 8.1083ln(x) + 57.22

## Sheet: 10c AKT   
Conc	% inhibition		e
100	82.4
10	73.5		2.71828
1	36
0.1	13
0.01	5.84
Conc.	Found % inhibition	Excel-Fit
100	82.4	84.872
10	73.5	84.872
1	36	42.148
0.1	13	20.786
0.01	5.84	-0.576006
IC50	2.331	2.33114
		9.2774
		42.148
Equation that describes the curve
y = 9.2774ln(x) + 42.148

## Sheet: 10d AKT  
Conc	% inhibition		e
100	91.1
10	80.4		2.71828
1	46.9
0.1	28.3
0.01	14.3
Conc.	Found % inhibition	Excel-Fit
100	91.1	93.3398
10	80.4	93.3398
1	46.9	52.2
0.1	28.3	31.6301
0.01	14.3	11.0602
IC50	0.782	0.781714
		8.9334
		52.2
Equation that describes the curve
y = 8.9334ln(x) + 52.2

## Sheet: A-674563 AKT
Conc	% inhibition		e
100	90.6
10	82.7		2.71828
1	64.5
0.1	40.6
0.01	27
Conc.	Found % inhibition	Excel-Fit
100	90.6	94.94
10	82.7	94.94
1	64.5	61.08
0.1	40.6	44.15
0.01	27	27.22
IC50	0.222	0.221585
		7.3526
		61.08
Equation that describes the curve
y = 7.3526ln(x) + 61.08
